# Supplementary material for: Identification of RNA binding protein interacting with circular RNA and hub candidate network for hepatocellular carcinoma
Source: publisher site journal article supplement (doi:10.18632/aging.203139), 2021-06-16
Supplement: Supplementary file [file aging-v13i12-203139-supplementary-material-SD1.pdf]

# SUPPLEMENTARY FIGURES

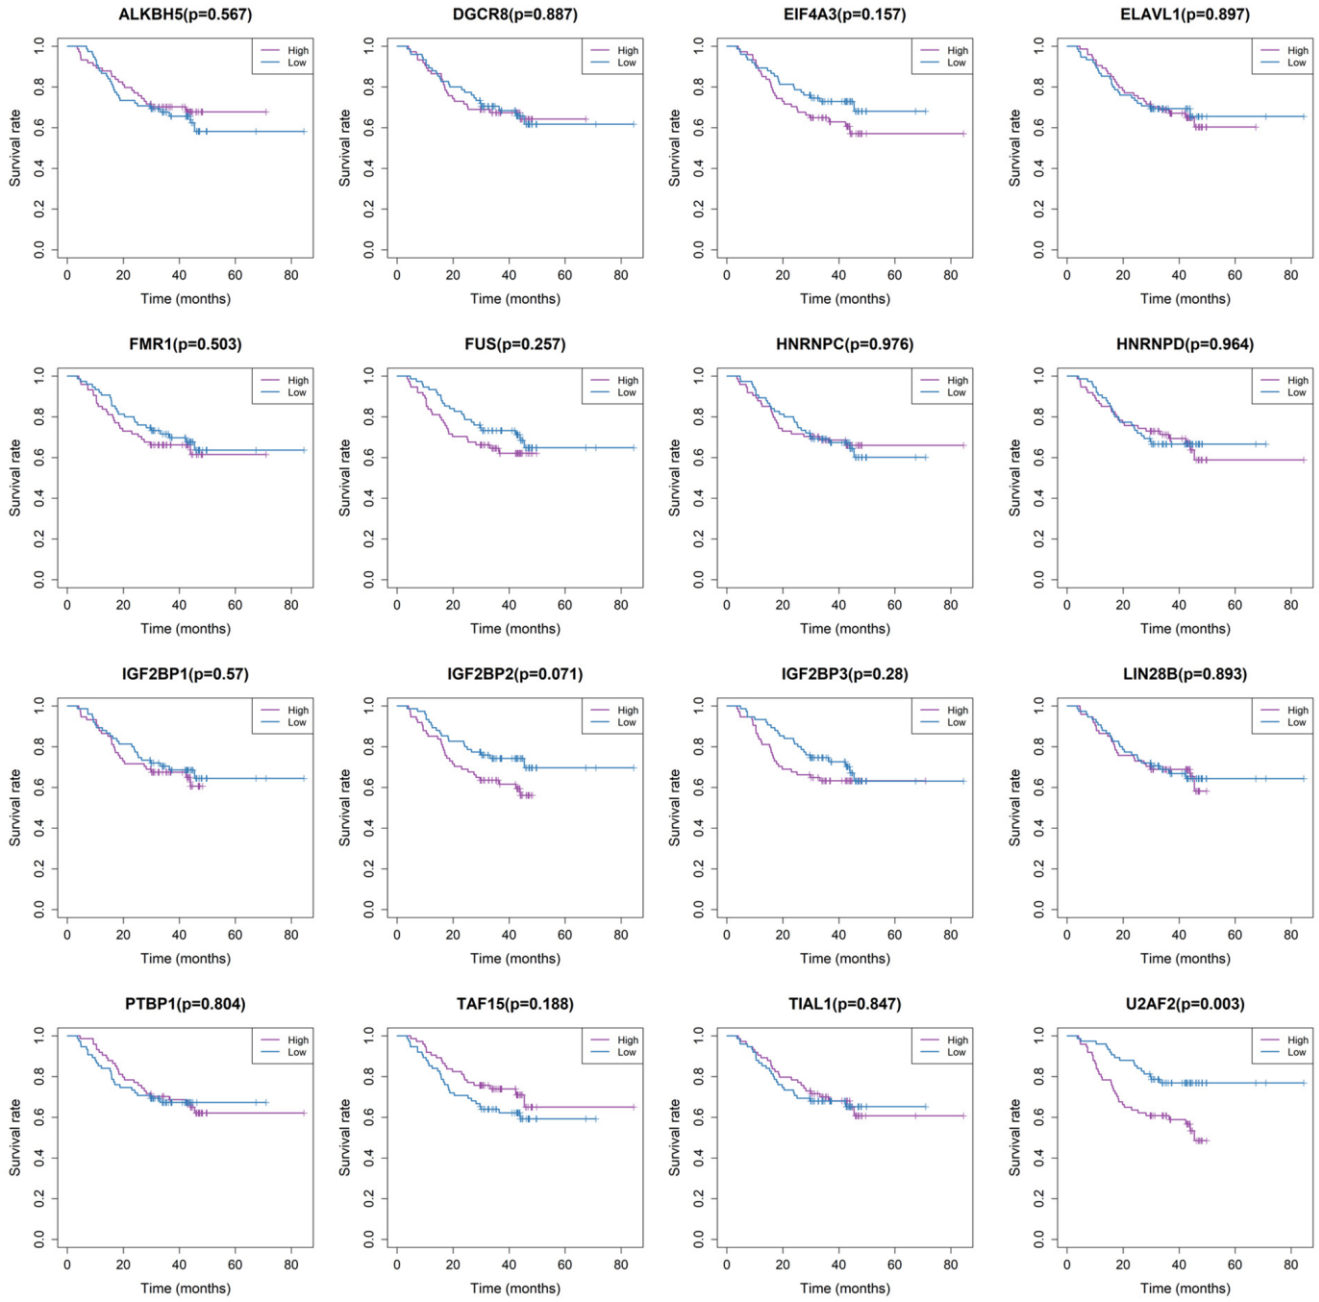

Supplementary Figure 1. Survival analysis of HCC cases with TARDBP low- and high-expression in CPTAC.

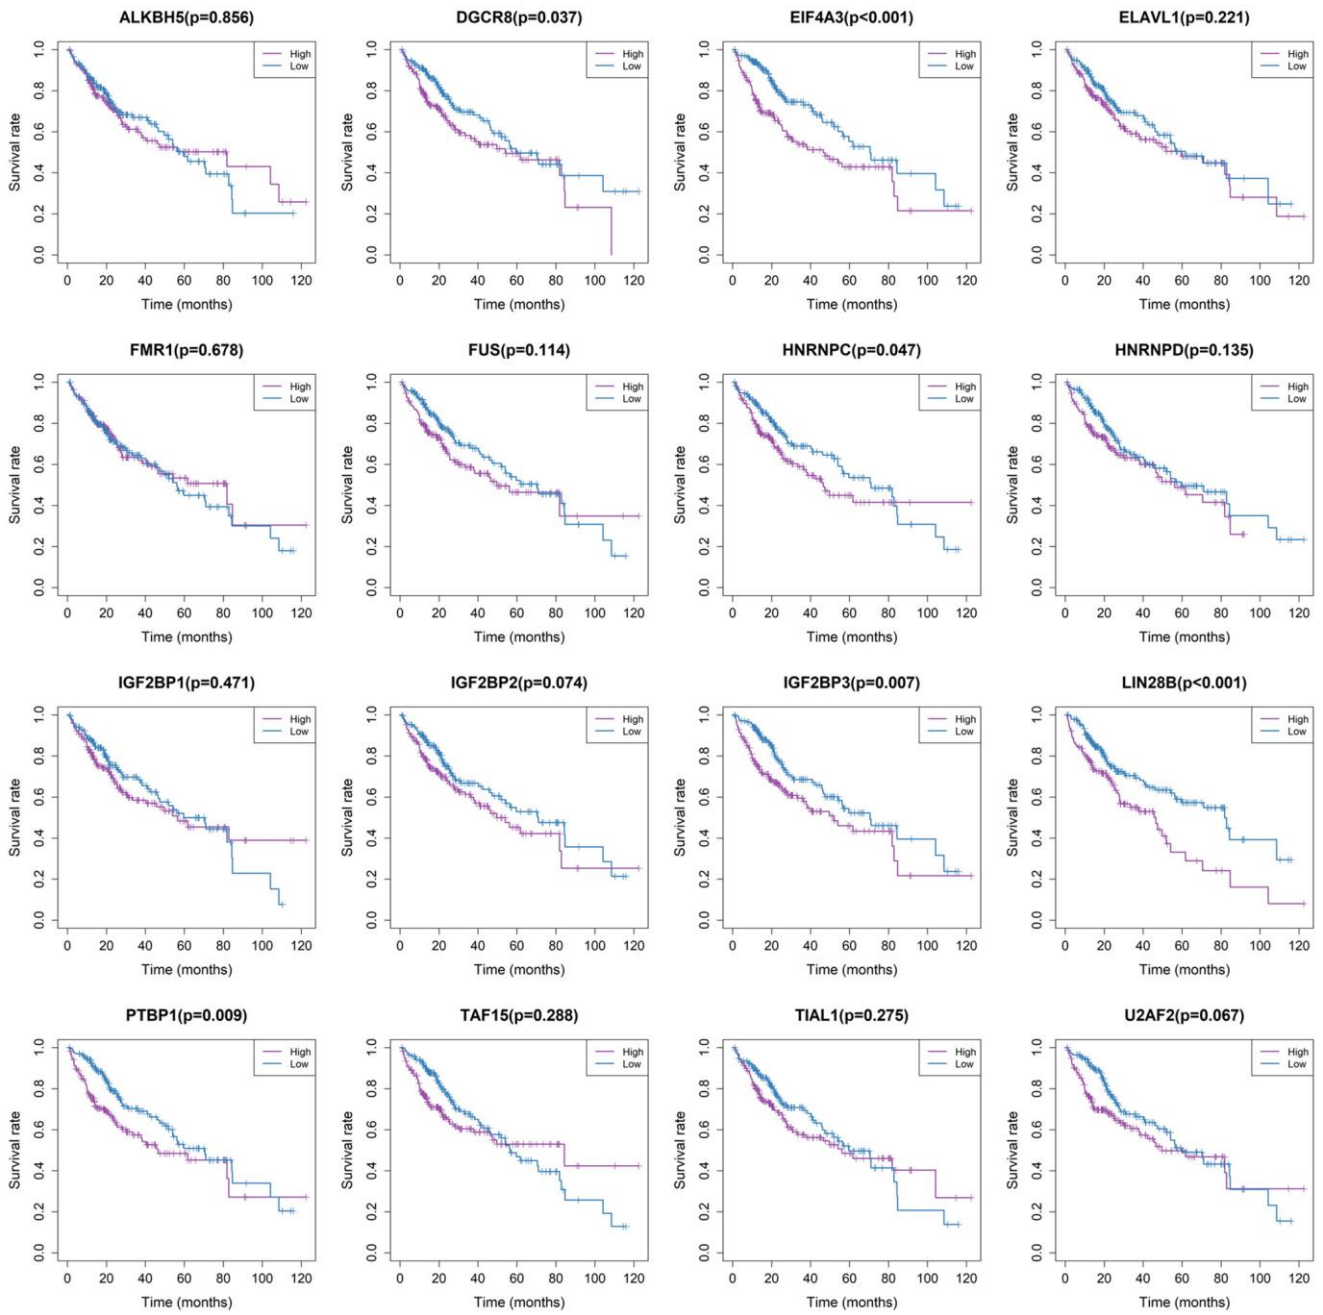

Supplementary Figure 2. Survival analysis of HCC cases with TARDBP low- and high-expression in TCGA.

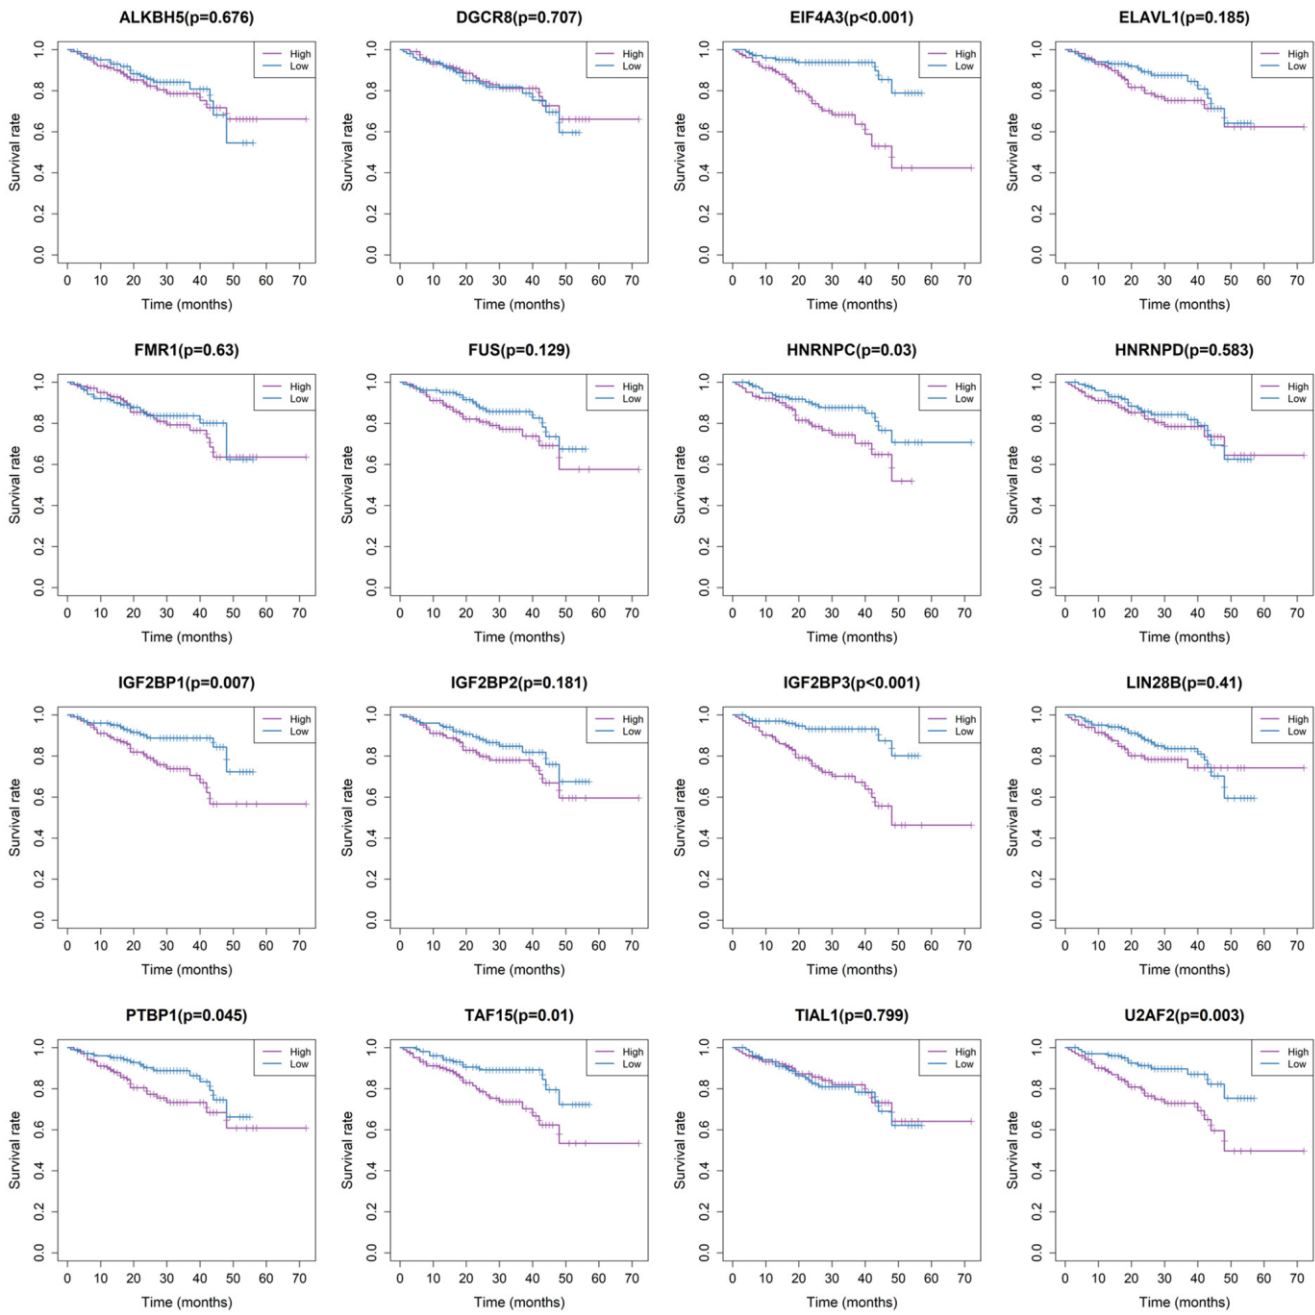

Supplementary Figure 3. Survival analysis of HCC cases with TARDBP low- and high-expression in ICGC.

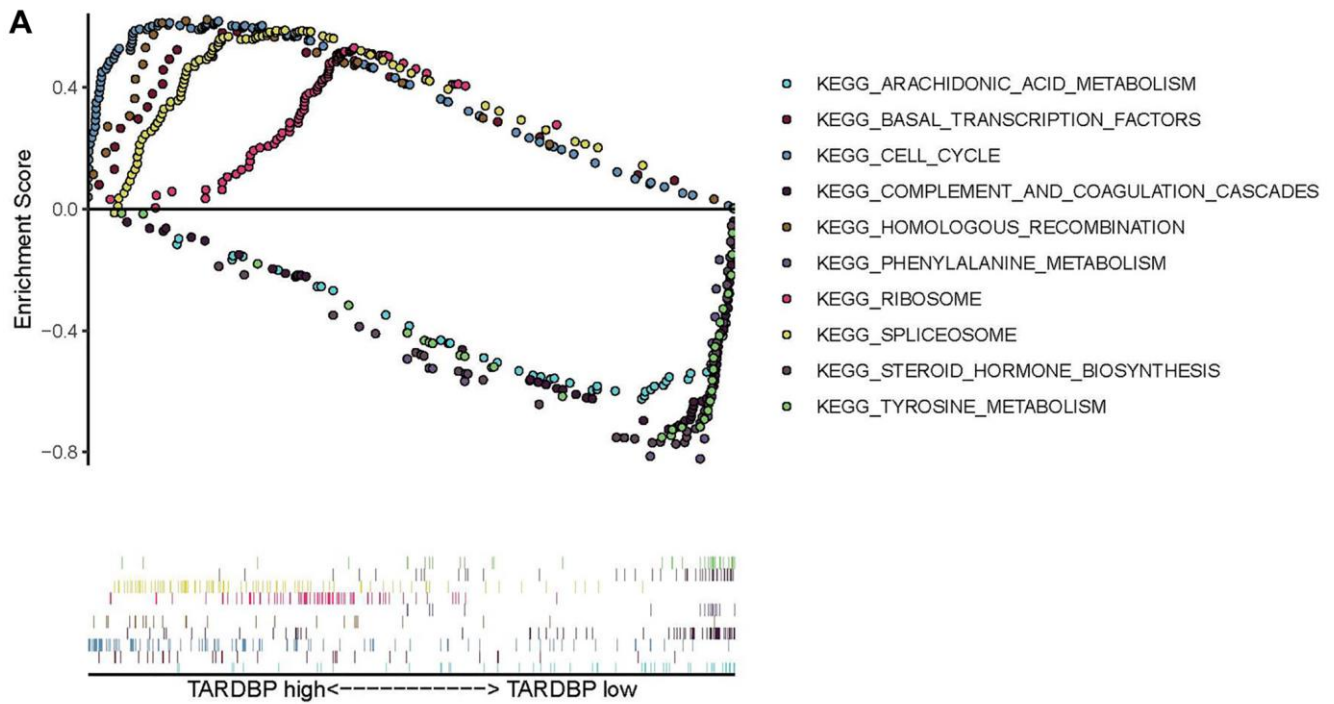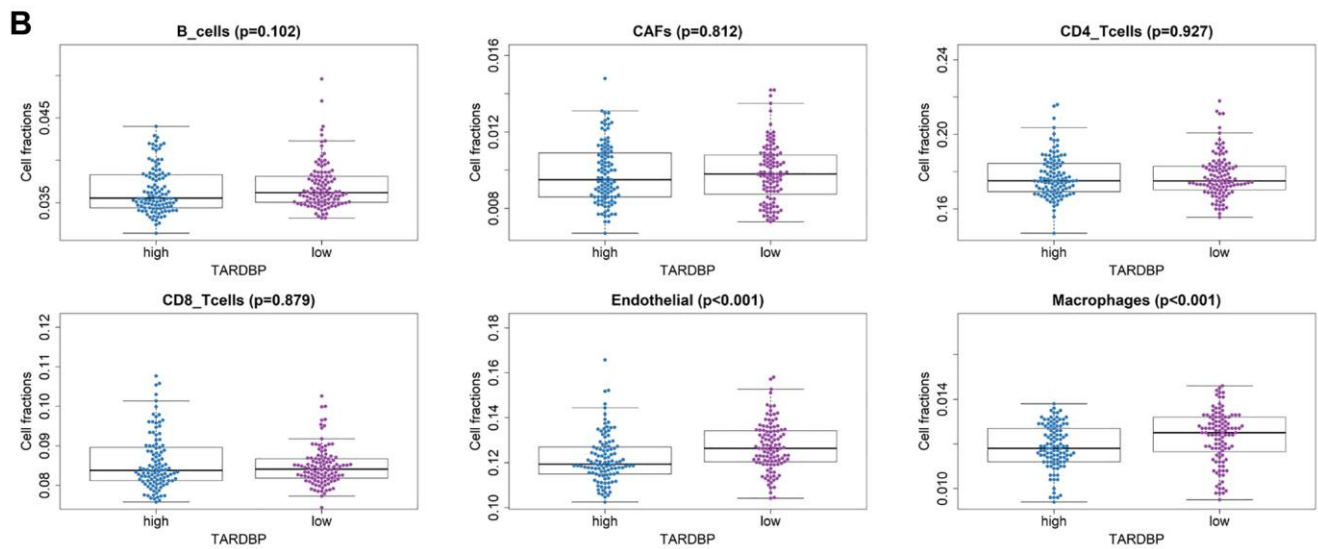

Supplementary Figure 4. GSEA and immune cell fractions analysis of HCC cases with TARDBP low- and high-expression in GSE14520.
